# Supplementary material for: Association of Habenula Activity and Volume with Pediatric Irritability: Inconsistent Parenting as a Moderator
Source: Research Square preprint supplement (doi:10.21203/rs.3.rs-7585144/v1), 2025-09-25
Supplement: Supplementary file 1 [file 445314e186239633c47ff261.pdf]

## **Supplement**

### **Association of Habenula Activity and Volume with Pediatric Irritability: Inconsistent Parenting as a Moderator**

**Results S1.** Dice Similarity Coefficient Results

**Results S2.** Behavioral Results

### Results S1. Dice Similarity Coefficient Results

The segmentations generated by the MAgEbrain algorithm exhibited excellent agreement with the manually created ones by the first author (Mean DSC; left=0.812, right=0.836).

| Scan               | Left          | Right         |
|--------------------|---------------|---------------|
| Sample 1           | 0.84          | 0.77          |
| Sample 2           | 0.92          | 0.82          |
| Sample 3           | 0.75          | 0.92          |
| Sample 4           | 0.83          | 0.82          |
| Sample 5           | 0.72          | 0.85          |
| Mean ( <i>SD</i> ) | 0.812 (0.792) | 0.836 (0.055) |

To assess the Dice Similarity Coefficient (DSC), five scans (10% of the total 50) were randomly selected. This sampling proportion aligns with previous studies[1, 2], where 10–14% of segmentations produced by the MAgEbrain algorithm were evaluated for DSC.

## **Results S2. Behavioral Results**

### ***Correlation between parent- and child-reported ARI***

Pearson correlation was calculated to examine the magnitude of agreement between the parent-reported and youth-reported ARI; significance level was set at  $p = 0.05$ . Result showed a significant moderate to strong positive correlation;  $r(43) = 0.61$ ,  $p < .001$ .

### ***Correlation between parent-reported ARI and child-reported frustration ratings***

Pearson correlation was calculated to examine the magnitude of agreement between the parent-reported ARI and youth-reported frustration ratings; significance level was set at  $p=0.05$ . Result showed a non-significant correlation;  $r(40) = 0.27$ ,  $p = .083$ .

### ***Correlation between child-reported ARI and child-reported frustration ratings***

Pearson correlation was calculated to examine the magnitude of agreement between the youth-reported ARI and frustration ratings; significance level was set at  $p=0.05$ . Result showed a non-significant correlation;  $r(40) = 0.23$ ,  $p = .151$ .

## References

1. Germann J, Gouveia FV, Martinez RCR, Zanetti MV, de Souza Duran FL, Chaim-Avancini TM, et al. Fully Automated Habenula Segmentation Provides Robust and Reliable Volume Estimation Across Large Magnetic Resonance Imaging Datasets, Suggesting Intriguing Developmental Trajectories in Psychiatric Disease. *Biol Psychiatry Cogn Neurosci Neuroimaging* 2020;5:923–9. <https://doi.org/10.1016/j.bpsc.2020.01.004>.
2. Germann J, Gouveia FV, Brentani H, Bedford SA, Tullo S, Chakravarty MM, et al. Involvement of the habenula in the pathophysiology of autism spectrum disorder. *Sci Rep* 2021;11:21168. <https://doi.org/10.1038/s41598-021-00603-0>.
